# Supplementary material for: Chondrocyte secretome enriched microparticles encapsulated with the chondrocyte membrane to facilitate the chondrogenesis of BMSCs and reduce hypertrophy
Source: Royal Society of Chemistry journal article supplement (doi:10.1039/d1tb02319e), 2021-01-01
Supplement: d1tb02319e1.pdf [file d1tb02319e1.pdf]

# Chondrocytes secretome enriched microparticles encapsulated with chondrocyte membrane to facilitate the chondrogenesis of BMSCs and reduce hypertrophy

*Zizhao Tang<sup>1,2</sup>, Yan Lu<sup>1,2</sup>, Shixin Zhang<sup>1,2</sup>, Jing Wang<sup>3</sup>, Qiguang Wang<sup>1,2\*</sup>, Yumei Xiao<sup>1,2</sup>, and Xingdong Zhang<sup>1,2</sup>*

1 National Engineering Research Center for Biomaterials, Sichuan University, 29 Wangjiang Road, Chengdu, Sichuan, 610065, China

2 College of Biomedical Engineering, Sichuan University, 29 Wangjiang Road, Chengdu, Sichuan, 610065, China

3 College of Materials and Chemistry & Chemical Engineering, Chengdu University of Technology, Chengdu, Sichuan, 610059, China

## **Corresponding Author**

\*Email: [wqgwang@126.com](mailto:wqgwang@126.com)

**Table. S1.** Primers were used to amplify mRNAs encoding rabbit GAPDH.

| <b>Gene</b>   | <b>Forward primer</b>  | <b>Reverse primer</b> |
|---------------|------------------------|-----------------------|
| <i>GAPDH</i>  | TCGGAGTGAACGGATTTGGC   | TTCCCGTTCTCAGCCTTGAC  |
| <i>COL2A1</i> | TGATAAGGATGTGTGGAAGCCG | CAGGCAGTCCTTGGTGTCTTC |
| <i>AGG</i>    | GGCCACTGTTACCGTCACTT   | GTCCTGAGCGTTGTTGTTGAC |
| <i>SOX9</i>   | TCTGGAGACTGCTGAACGAG   | CTGCCCATTCCTCACCGACTT |
| <i>COL1A1</i> | AGAGGACCACGTGGAGAAAG   | CCATCAAACCTGAGCAGCAAA |
| <i>COLX</i>   | TCCCAGA ACCCAGAATCCATC | GGTTGTGGGCCT TTTATGCC |
